# Supplementary material for: Fractionation and characterization of lignin from sugarcane bagasse using a sulfuric acid catalyzed solvothermal process
Source: Royal Society of Chemistry journal article supplement (doi:10.1039/d1ra03237b), 2021-01-01
Supplement: d1ra03237b1.pdf [file d1ra03237b1.pdf]

## **Fractionation and Characterization of Lignin from Sugarcane Bagasse Using a Sulfuric Acid Catalyzed Solvothermal Process**

Saksit Imman<sup>a</sup>, Punjarat Khongchamnan<sup>a</sup>, Wanwitoo Wanmolee<sup>b</sup>, Navadol Laosiripojana<sup>c</sup>, Torpong Kreetachat<sup>a</sup>, Chainarong Sakulthaew<sup>d</sup>, Chanat Choekjaroenrat<sup>e</sup> and Nopparat Suriyachai<sup>a</sup>

<sup>a</sup>School of Energy and Environment, University of Phayao, Tambon Maeka, Amphur Muang Phayao 56000, Thailand

<sup>b</sup>National Nanotechnology Center (NANOTEC), National Science and Technology Development Agency (NSTDA), Pathum Thani 12120, Thailand

<sup>c</sup>The Joint Graduate School for Energy and Environment (JGSEE), King Mongkut's University of Technology Thonburi, Prachauthit Road, Bangmod, Bangkok 10140, Thailand

<sup>d</sup>Department of Veterinary Technology, Faculty of Veterinary Technology, Kasetsart University, Bangkok, Thailand

<sup>e</sup>Department of Environmental Technology and Management, Faculty of Environment, Kasetsart University, Bangkok, Thailand

## Electronic Supplementary Information

**Table S1** Product profile in liquid fraction during solvothermal fractionation process

| Run No. | Response                  | Concentration of product in hydrolysate (g/L) |        |           |             |             |             |      |          |
|---------|---------------------------|-----------------------------------------------|--------|-----------|-------------|-------------|-------------|------|----------|
|         | Hemicellulose removal (%) | Glucose                                       | Xylose | Arabinose | Acetic acid | Formic acid | Lactic acid | HMF  | Furfural |
| 1       | 94.3                      | 2.32                                          | 10.61  | 1.12      | 0.21        | 0.17        | 0.13        | 0.11 | 0.32     |
| 2       | 89.6                      | 2.13                                          | 12.31  | 0.65      | 0.13        | 0.09        | 0.09        | 0.04 | 0.25     |
| 3       | 96.7                      | 3.56                                          | 9.83   | 1.57      | 0.41        | 0.25        | 0.16        | 0.12 | 0.38     |
| 4       | 89.1                      | 1.75                                          | 11.15  | 2.22      | 0.24        | 0.12        | 0.05        | 0.05 | 0.14     |
| 5       | 97.2                      | 3.78                                          | 10.23  | 1.51      | 0.18        | 0.32        | 0.22        | 0.27 | 0.42     |
| 6       | 95.9                      | 3.21                                          | 9.97   | 1.86      | 0.27        | 0.17        | 0.11        | 0.16 | 0.29     |
| 7       | 93.1                      | 2.83                                          | 10.72  | 1.22      | 0.26        | 0.26        | 0.18        | 0.15 | 0.32     |
| 8       | 98.6                      | 3.96                                          | 8.66   | 0.91      | 0.35        | 0.25        | 0.16        | 0.24 | 0.41     |
| 9       | 89.8                      | 1.19                                          | 12.17  | 1.55      | 0.13        | 0.14        | 0.06        | 0.08 | 0.12     |
| 10      | 93.3                      | 2.45                                          | 11.48  | 2.64      | 0.37        | 0.15        | 0.09        | 0.09 | 0.26     |
| 11      | 92.7                      | 2.75                                          | 11.28  | 2.76      | 0.19        | 0.24        | 0.05        | 0.14 | 0.19     |
| 12      | 94.1                      | 2.13                                          | 10.97  | 1.64      | 0.22        | 0.22        | 0.12        | 0.15 | 0.25     |
| 13      | 95.6                      | 2.56                                          | 11.32  | 2.89      | 0.29        | 0.19        | 0.23        | 0.17 | 0.21     |
| 14      | 96.4                      | 2.51                                          | 9.43   | 3.16      | 0.31        | 0.33        | 0.18        | 0.26 | 0.17     |
| 15      | 88.4                      | 1.22                                          | 12.51  | 1.59      | 0.11        | 0.05        | 0.07        | 0.04 | 0.07     |

**Table S2** Assignment of FT-IR spectra of native sugarcane bagasse and remaining pulp

| Assignment                                                                | Wavenumber (cm <sup>-1</sup> ) |                |
|---------------------------------------------------------------------------|--------------------------------|----------------|
|                                                                           | Native sugarcane bagasse       | Remaining pulp |
| O-H stretching vibrations of the -OH groups                               | 3338                           | 3332           |
| C-H stretching vibrations                                                 | 2916                           | 2902           |
| C=O ester group vibration of the acetyl and uronic ester groups           | 1734                           | N/A            |
| O-H bending vibrations of absorbed water                                  | 1637                           | 1637           |
| Aromatic C=C in plane stretching of the aromatic ring                     | 1514                           | N/A            |
| C=C stretching vibration of the aromatic rings                            | 1462                           | N/A            |
| Acetyl groups present as branched groups                                  | 1232                           | N/A            |
| C-O-H, stretching of alcohols                                             | N/A                            | 1053           |
| C-O-C pyranose ring skeleton                                              | 1031                           | 1029           |
| Glycosidic C-H stretching vibration out of the plane of the aromatic ring | N/A                            | 898            |

**Table S3** Assignment of FT-IR spectra of commercial organosolv lignin and lignin recovery

| Assignment                                                         | Wavenumber (cm <sup>-1</sup> ) |                 |
|--------------------------------------------------------------------|--------------------------------|-----------------|
|                                                                    | Commercial organosolv lignin   | Lignin recovery |
| O-H stretching                                                     | 3410                           | 3406            |
| C-H stretching in CH <sub>2</sub> and CH <sub>3</sub> groups       | 2935, 2845                     | 2935, 2845      |
| C=O stretching, unconjugated                                       | 1699                           | 1704            |
| Aromatic skeletal vibrations (S > G)                               | 1602                           | 1605            |
| Aromatic skeletal vibrations (G > S)                               | 1514                           | 1514            |
| C-H deformations in -CH <sub>2</sub> - and -CH <sub>3</sub>        | 1459                           | 1463            |
| Aromatic skeletal vibrations                                       | 1422                           | 1427            |
| Aliphatic C-H stretch in CH <sub>3</sub> , not in OCH <sub>3</sub> | 1362                           | 1367            |
| S ring breathing                                                   | 1330                           | 1325            |
| G ring breathing                                                   | 1261                           | 1265            |
| C-C and C-O stretch, G condensed > G                               | 1224                           | 1219            |
| C-O stretch in ester groups (HGS)                                  | 1173                           | 1168            |
| Aromatic C-H in plane deformation (S)                              | 1127                           | 1121            |
| Aromatic C-H in plane deformation (G > S)                          | 1030                           | 1035            |
| CH=CH- out-of-plane deformation (trans)                            | 984                            | 984             |
| Aromatic C-H out-of-plane deformation (G)                          | N/A                            | N/A             |
| Aromatic C-H out-of-plane deformation (S + H)                      | 835                            | 836             |
| C-H bond in the aromatic ring from G                               | N/A                            | N/A             |

**Table S4** Glass transition temperature of commercial organosolv lignin and lignin recovery

| <b>Sample</b> | <b>T<sub>g</sub> onset<br/>(°C)</b> | <b>T<sub>g</sub><br/>(°C)</b> |
|---------------|-------------------------------------|-------------------------------|
| COL           | 145.7                               | 154.1                         |
| BGL           | 102.5                               | 111.6                         |

**Table S5** Summary of lignin properties from various biomass resource during solvothermal process.

| Raw materials     | Extraction process                         | Lignin yield (%) | $M_w^a$ | $M_n^b$ | PDI <sup>c</sup> | DTG <sub>max</sub> (°C) <sup>d</sup> | T <sub>g</sub> (°C) <sup>e</sup> | S:G:H <sup>f</sup> | Lignin substructures <sup>g</sup>                                                                                                                                                                                                                                                                                                                   | References |
|-------------------|--------------------------------------------|------------------|---------|---------|------------------|--------------------------------------|----------------------------------|--------------------|-----------------------------------------------------------------------------------------------------------------------------------------------------------------------------------------------------------------------------------------------------------------------------------------------------------------------------------------------------|------------|
| Sugarcane bagasse | One-step fractionation MIBK:methanol:water | 87.1             | 1374    | 785     | 1.75             | 291 and 437                          | 111.6                            | 25.1:42.1:32.6     | β-O-4' linkages, resinol structures formed by β-β, syringyl unit, guaiacyl unit, <i>p</i> -hydroxyphenyl unit, <i>p</i> -coumarate, and ferrulate                                                                                                                                                                                                   | This study |
| Sugarcane bagasse | Ethanol pretreatment                       | N/A              | 6441    | 4181    | 1.51             | 355                                  | N/A                              | 25.32:58.23:16.46  | β-O-4, C <sub>v</sub> -acetylated β-O-4, phenylcoumaran, resinol, β-D-Xylopyranoside                                                                                                                                                                                                                                                                | [35]       |
| Sugarcane bagasse | Glycerol pretreatment                      | 60.4             | 4288    | 1958    | 2.2              | N/A                                  | N/A                              | 51:43:5            | β-aryl ether, phenylcoumaran, resinol, guaiacyl, <i>p</i> -hydroxyphenyl, syringyl, <i>p</i> -coumarate, ferulate, feruloyl glycerol                                                                                                                                                                                                                | [41]       |
| Sugarcane bagasse | Acid-catalysed crude glycerol pretreatment | 85.2             | N/A     | N/A     | N/A              | N/A                                  | N/A                              | 46:45:9            | Guaiacyl, <i>p</i> -hydroxyphenyl, syringyl, cinnamate, β-O-4, β-5, β-β, cinnamoyl glycerol                                                                                                                                                                                                                                                         | [42]       |
| Sugarcane bagasse | Acetosolv extraction                       | 55.6             | 2480    | 248     | 10               | >500                                 | 46-60                            | N/A                | Syringyl, oxidized syringyl, guaiacyl, <i>p</i> -hydroxyphenyl, <i>p</i> -coumarate, cinnamic aldehyde, aryl ether with A-α, β-O-4, ferulate, phenylcoumaran                                                                                                                                                                                        | [43]       |
| Sugarcane bagasse | Acidified ethylene glycol                  | 35.8             | 6518    | 3821    | 1.7              | 380                                  | N/A                              |                    | b-O-4 alkylaryl ethers, b-O-4' aryl ethers linkages with and <i>p</i> -hydroxybenzoated -OH at <i>g</i> -carbon, resinol, phenylcoumarane formed by b-5' and a-O-4', spirodienones formed by b-1' and a-O-a', <i>p</i> -hydroxyphenyl, syringyl, oxidised syringyl, guaiacyl, oxidised guaiacyl, <i>p</i> -hydroxybenzoate, <i>p</i> -coumaric acid | [37]       |
| Aleppo            | Ethanol/water                              | N/A              | N/A     | N/A     | N/A              | 344 and                              | 96.5                             | N/A                | Syringyl, guaiacyl, methoxyl                                                                                                                                                                                                                                                                                                                        | [22]       |

|                |                                            |       |           |           |       |     |     |                                   |                                                                                                                                                                                                                                                                                                                                                    |      |
|----------------|--------------------------------------------|-------|-----------|-----------|-------|-----|-----|-----------------------------------|----------------------------------------------------------------------------------------------------------------------------------------------------------------------------------------------------------------------------------------------------------------------------------------------------------------------------------------------------|------|
| pine           | pretreatment                               |       |           |           |       | 388 |     |                                   | groups, etherified syringyl, etherified guaiacyl                                                                                                                                                                                                                                                                                                   |      |
| Chinese quince | Ethanol organosolv pretreatment            | 14.4  | 5636      | 2255      | 2.5   | 374 | N/A | 59.72:40.21:0.07                  | $\beta$ -O-4' linkage, C $_{\alpha}$ -ethoxylation- $\beta$ -O-4' linkage, resinol structures formed by $\beta$ - $\beta$ , phenylcoumaran formed by $\beta$ -5' linkage, spirodienone formed by $\beta$ -1' linkage, guaiacyl, p-hydroxyphenyl, cinnamyl alcohol end-groups, syringyl, oxidized syringyl units linked a carbonyl at C $_{\alpha}$ | [44] |
| Miscanthus     | Organosolv pulping (Ethanol:water)         | 77.86 | 1261-1921 | 1066-1365 | 1-1.5 | N/A | N/A | 0.95-4.05: 8.61-22.23:36.72-39.60 | N/A                                                                                                                                                                                                                                                                                                                                                | [45] |
| Eucalyptus     | One-step fractionation MIBK:methanol:water | N/A   | 10940     | 5163      | 2.1   | 351 | N/A | 62.5:30.3:0.9                     | $\beta$ -O-4' alkyl-aryl ethers, $\beta$ - $\beta$ resinols, $\beta$ -5' phenylcoumarans, syringyl, C $_{\alpha}$ -oxidized syringyl, guaiacyl                                                                                                                                                                                                     | [46] |

<sup>a</sup>Molecular weight according to GPC analysis

<sup>b</sup>Number-average molecular weight according to GPC analysis

<sup>c</sup>Polydispersity index (Mw/Mn) according to GPC analysis

<sup>d</sup>Derivative thermogravimetric curve according to TGA analysis

<sup>e</sup>Glass transition temperature according to DSC analysis

<sup>f</sup>Ratio of syringyl, guaiacyl, and p-hydroxyphenyl according to Py-GCMS analysis

<sup>g</sup>Lignin substructures according to NMR analysis
